# Supplementary material for: Comparison of Simulated Standard Versus Modified Jaw Thrust I-Gel Insertion Technique in Novice Anesthesiologists. A Randomised Control Crossover Trial
Source: Research Square preprint supplement (doi:10.21203/rs.3.rs-7064827/v1), 2025-08-18
Supplement: Supplementary file 1 [file aa07b67b5f5b465b2a749ab2.pdf]

**Annex-I**

**PROFORMA**

**COMPARISON OF SIMULATED STANDARD VERSUS MODIFIED  
JAW THRUST I-GEL INSERTION TECHNIQUE IN NOVICE  
ANESTHESIOLOGISTS. A RANDOMISED CONTROL CROSSOVER  
TRIAL**

**DEMOGRAPHIC DATA:**

**Serial No:**\_\_\_\_\_

**Group:**\_\_\_\_\_

**Age:**\_\_\_\_\_yrs

**Sex: M / F**

**Anesthesia Trainee Level:** \_\_\_\_\_ **Starting Date of training:**\_\_\_\_\_

**Previous information for supraglottic airway device (sad):**

**Do You Have Prior Information For Types Of SAD:** Yes / No

**If Yes: Write down Name of Devices:** \_\_\_\_\_

**Do You Have Prior Information For Insertion Techniques Of SAD:** Yes / No

**If Yes: Write down Name Of Insertion Techniques:** \_\_\_\_\_

---

**Do You Have Prior Practical Experience Of SAD:** Yes / No

**If Yes: Write down Name of Device and Insertion Technique:** \_\_\_\_\_

---

**Do You Have Prior Practical Experience With Study's Insertion Technique:** Yes / No

**If Yes: Mark The Name Of Insertion Techniques:**

| <b>STANDARD I-GEL INSERTION TECHNIQUE:</b> |                                      |
|--------------------------------------------|--------------------------------------|
| <b>Insertion attempts</b>                  | <b>Insertion time duration (sec)</b> |
| 1                                          |                                      |
| 2                                          |                                      |
| 3                                          |                                      |
| 4                                          |                                      |
| 5                                          |                                      |
| 6                                          |                                      |
| 7                                          |                                      |
| 8                                          |                                      |
| 9                                          |                                      |
| 10                                         |                                      |

| <b>MODIFIED JAW THRUST I-GEL INSERTION TECHNIQUE:</b> |                                      |
|-------------------------------------------------------|--------------------------------------|
| <b>Insertion attempts</b>                             | <b>Insertion time duration (sec)</b> |
| 1                                                     |                                      |
| 2                                                     |                                      |
| 3                                                     |                                      |
| 4                                                     |                                      |
| 5                                                     |                                      |
| 6                                                     |                                      |
| 7                                                     |                                      |
| 8                                                     |                                      |
| 9                                                     |                                      |
| 10                                                    |                                      |

**Trainee's preference for sad insertion technique:**

Which Study's Insertion Technique You Preferred To Start Learning At Your Level Of Training:

Standard I-GEL Insertion Technique: ☐

Modified Jaw Thrust Insertion technique: ☐

Both Study's Insertion Technique: ☐

Which Study's Insertion Technique Is Easy To Learn At Your Level:

Standard I-GEL Insertion Technique: ☐

Modified Jaw Thrust Insertion technique: ☐

Both Study's Insertion Technique: ☐

Which Study's Insertion Technique You Preferred to Practice At Most At Your Level:

Standard I-GEL Insertion Technique: ☐

Modified Jaw Thrust Insertion technique: ☐

Both Study's Insertion Technique: ☐

Any Comments: \_\_\_\_\_
